# Supplementary material
Source: HighWire-hosted journal article supplement (https://fn.bmj.com/content/108/5/478)
Supplement: inline-supplementary-material-1 [file inline-supplementary-material-1.pdf]

**Suppl. table 1.** Temporal change in overall mortality, invasive therapy and late-onset sepsis

| Year of birth                       | 2009 - 2013          |                       | 2014 - 2018          |                       | p-value | p-value |
|-------------------------------------|----------------------|-----------------------|----------------------|-----------------------|---------|---------|
|                                     | 22-27 weeks<br>N=815 | 28-31 weeks<br>N=1921 | 22-27 weeks<br>N=835 | 28-31 weeks<br>N=1725 |         |         |
| Gestational age                     |                      |                       |                      |                       |         |         |
| Overall mortality (%)               | 202/815 (24.8)       | 57/1921 (3.0)         | 159/835 (19.0)       | 45/1725 (2.6)         | 0.005   | 0.512   |
| Mechanical ventilation days         |                      |                       |                      |                       |         |         |
| • Median (IQR)                      | 6 (2,21)             | 0 (0,1)               | 7 (2,23)             | 0 (0,0)               | 0.807   | 0.004   |
| • Mean (SD)                         | 15 (23)              | 1 (5)                 | 16 (24)              | 2 (11)                |         |         |
| Central catheters days              |                      |                       |                      |                       |         |         |
| • Median (IQR)                      | 14 (8,21)            | 0 (0,7)               | 14 (9,22)            | 0 (0,6)               | 0.05    | 0.019   |
| • Mean (SD)                         | 17 (17)              | 4 (10)                | 20 (26)              | 4 (11)                |         |         |
| Parenteral nutrition days           |                      |                       |                      |                       |         |         |
| • Median (IQR)                      | 10 (6,16)            | 0 (0,6)               | 12 (8,17)            | 0 (0,6)               | <0.001  | 0.409   |
| • Mean (SD)                         | 13 (15)              | 4 (9)                 | 18 (24)              | 4 (10)                |         |         |
| Culture-positive LOS (%)            | 139 (17.1)           | 74 (3.8)              | 215 (25.6)           | 65 (3.8)              | <0.001  | 0.967   |
| • Gram-negative LOS (%)             | 24 (2.9)             | 12 (0.6)              | 45 (5.4)             | 14 (0.8)              | 0.013   | 0.503   |
| • CoNS LOS (%)                      | 54 (6.6)             | 30 (1.6)              | 108 (12.9)           | 32 (1.9)              | <0.001  | 0.287   |
| • Gram-positive LOS, excl. CoNS (%) | 56 (6.9)             | 32 (1.7)              | 57 (6.8)             | 18 (1.0)              | 0.971   | 0.107   |
| • Candida LOS (%)                   | 5 (0.6)              | 0 (0)                 | 5 (0.6)              | 1 (0.1)               | 0.969   | 0.291   |
| Culture-negative LOS (%)            | 101 (12.4)           | 51 (2.7)              | 82 (9.8)             | 48 (2.9)              | 0.096   | 0.813   |

P values calculated by Mann-Whitney U test
